# Supplementary material for: Understanding the Knowledge, Attitudes, and Practices of Healthy Eating among Adolescents in Chongqing, China: An Empirical Study Utilizing Structural Equation Modeling
Source: MDPI journal article supplement (doi:10.3390/nu16010167), 2024-01-04
Supplement: s1 [file s1]

**File S1: Questionnaire on healthy diet knowledge, attitude and behavior of  
middle school students in Chongqing**

**Basic information** (Tick "√" on the option you think is appropriate and fill in the specific information on "\_\_\_\_\_")

1. Your date of birth: \_\_\_\_\_ Year \_\_\_\_\_ month
2. Your gender: ① male ② female
3. Your ethnicity is: ① Han ② Miao ③ Tujia ④ Hui ⑤ Others \_\_\_\_\_
4. Your grade: ① Grade one of junior high school ② Grade two of junior high school  
③ Grade three of junior high school
5. Are you currently living on campus? ① Yes ② No
6. Your family's place of residence: ① Urban ② Rural
7. Whether you are the only child: ① Yes ② No, there are \_\_\_\_\_ brothers and sisters  
(excluding yourself)
8. Your father's education level: ① Primary school and below ② Junior middle school  
③ High school/Vocational high school ④ Junior college/Bachelor degree and above  
⑤ Don't know
9. Your mother's education level: ① Primary school and below ② Junior middle  
school ③ High school/Vocational high school ④ Junior college/Bachelor degree and  
above ⑤ Don't know
10. Last measured, your height: \_\_\_\_\_ cm, your weight: \_\_\_\_\_ kg

**Knowledge part(Multiple choice)**

1. The "Dietary Guidelines for Chinese Residents" put forward six core recommendations, in addition to less salt and oil, control sugar and limit alcohol; Waste elimination, which of the following does it include?  
① Variety of food, mainly cereals; Eat less and move more for a healthy weight; Eat more fish, poultry, eggs, lean meat; Eat a moderate amount of vegetables, fruits, milk, soybeans.  
② Various foods, fruits and vegetables, milk, soybeans; Eat dynamic balance, healthy weight; Eat more grains; Eat a moderate amount of fish, poultry, eggs, lean meat.

③Variety of food, mainly cereals; Eat dynamic balance, healthy weight; Eat more fruits and vegetables, dairy products, soybeans; Eat a moderate amount of fish, poultry, eggs, lean meat.

④Variety of food, fruits and vegetables, milk, soybeans; Eat dynamic balance, healthy weight; Eat more fish, poultry, eggs, lean meat; Eat cereals and tubers in moderation.

⑤ Don't know

2. Based on the nutritional labels of the following two dairy products, please determine which one belongs to a dairy product with higher nutritional value?

| Nutrition Facts List A                                                       |           |      | Nutrition Facts List B |           |      |
|------------------------------------------------------------------------------|-----------|------|------------------------|-----------|------|
| Items                                                                        | Per 100ml | NRV% | Items                  | Per 100ml | NRV% |
| Energy                                                                       | 146KJ     | 2%   | Energy                 | 261KJ     | 3%   |
| Protein                                                                      | 1.0g      | 2%   | Protein                | 3.0g      | 5%   |
| Fat                                                                          | 1.2g      | 2%   | Fat                    | 3.6g      | 6%   |
| Carbohydrate                                                                 | 4.6g      | 2%   | Carbohydrate           | 4.5g      | 2%   |
| Sodium                                                                       | 67mg      | 3%   | Sodium                 | 60mg      | 3%   |
| Ingredients: water, whole milk powder, white sugar, whey protein powder, etc |           |      | Ingredients: raw milk  |           |      |

3. Which of the statements about daily combinations and consumption of vegetables and fruits is incorrect?

① Vegetables should be included in the meal.

②Should eat more dark vegetables (such as green leafy vegetables, carrots, tomatoes, etc.), accounting for at least half of the total vegetables.

③You should eat fruit every day, and ensure that you eat 200g to 350g (the size of two fists) of fruit every day.

④Drinking fresh fruit juice can replace eating fruit.

⑤ Don't know

4. A salty diet is most likely to cause which diseases?

① Hypertension ② Diabetes ③ Obesity ④ Gout ⑤ Unclear

5. Long-term consumption of sugary drinks increases the risk of which of the following diseases? (Multiple options available)

① Caries ② Obesity ③ Affects blood pressure ④ Affects bone development  
⑤ Don't know

6. What are the advantages of "separate dining system"? (Multiple options available)

① Reduce the risk of oral transmission of infectious diseases (such as hepatitis A).  
② Help control food intake.  
③ It's good for reducing food waste.  
④ it's good for personalizing diets.  
⑤ Don't know

**Attitudes part (Please tick "√" in the corresponding position of your selected option)**

| Items                                                                                                 | Strong agree | Agree | Neutral | Disagree | Strongly disagree |
|-------------------------------------------------------------------------------------------------------|--------------|-------|---------|----------|-------------------|
| I think it is important to know nutrition for health.                                                 |              |       |         |          |                   |
| I would like to use my nutrition knowledge to guide my daily eating behavior.                         |              |       |         |          |                   |
| "Separate dining system"* or "public chopsticks and spoons" should be promoted in public restaurants. |              |       |         |          |                   |
| There are great food safety risks in roadside food stalls.                                            |              |       |         |          |                   |

\*The separate dining system refers to a dining method where there is no cross-contact or mixing of tableware, dishes, and beverages during the meal [1].

**Behavior part (Please tick "√" in the corresponding position of the option you selected)**

| Items                                                                                           | Always | Often | Sometimes | Occasionally | Never |
|-------------------------------------------------------------------------------------------------|--------|-------|-----------|--------------|-------|
| I insist on three meals a day at a fixed time.                                                  |        |       |           |              |       |
| Even when I'm not thirsty, I hydrate myself regularly.                                          |        |       |           |              |       |
| When I buy food, I look at the production date and expiration date.                             |        |       |           |              |       |
| When dining in the dining hall, I will inform the staff in advance how much food I want to eat. |        |       |           |              |       |

Reference:

[1].Standard, P.N. Guidance on individual dining system in catering service. Availabe online:<http://c.gb688.cn/bzgk/gb/showGb?type=online&hcno=C07AF2A9821A56C245A1A6465A016787> (accessed on June 21, 2020).
